# Supplementary material for: Determination of MYD88L265P mutation fraction in IgM monoclonal gammopathies
Source: PubMed Central journal article supplement — Blood Adv. 2022 Jan 7;6(1):189–99. doi: 10.1182/bloodadvances.2021005354 (PMC8753203; doi:10.1182/bloodadvances.2021005354), 2022-01-07
Supplement: advancesADV2021005354-suppl1.pdf [file advancesADV2021005354-suppl1.pdf]

## Determination of *MYD88*<sup>L265P</sup> mutation fraction in IgM monoclonal gammopathies

Tina Bagratuni<sup>1</sup>, Athina Markou<sup>2</sup>, Dimitrios Patseas<sup>1</sup>, Nefeli Mavrianou-Koutsoukou<sup>1</sup>, Foteini

Aktypi<sup>1</sup>, Christine Ivy Liacos<sup>1</sup>, Aimilia D Sklirou<sup>3</sup>, Foteini Theodorakakou<sup>1</sup>, Ioannis Ntanasis-

Stathopoulos<sup>1</sup>, Maria Gavriatopoulou<sup>1</sup>, Ioannis P. Trougkos<sup>3</sup>, Evi Lianidou<sup>2</sup>, Evangelos Terpos<sup>1</sup>,

Efstathios Kastritis<sup>1</sup>, Meletios A. Dimopoulos<sup>1</sup>

### Supplemental information

Table 1: Test performance statistics in Cast-PCR, ddPCR and AS-PCR assays

|                                      | Cast-PCR |                  | ddPCR   |                   | AS-PCR  |                   |
|--------------------------------------|----------|------------------|---------|-------------------|---------|-------------------|
|                                      | Value    | 95% CI           | Value   | 95% CI            | Value   | 95% CI            |
| <b>Sensitivity</b>                   | 90.80%   | 82.68% to 95.95% | 27.27%  | 6.02% to 60.97%   | 28.57%  | 3.67% to 70.96%   |
| <b>Specificity</b>                   | 87.50%   | 67.64% to 97.34% | 100.00% | 47.82% to 100.00% | 100.00% | 69.15% to 100.00% |
| <b>Positive Likelihood Ratio</b>     | 7.26     | 2.52 to 20.98    | -       | -                 | -       | -                 |
| <b>Negative Likelihood Ratio</b>     | 0.11     | 0.05 to 0.21     | 0.73    | 0.51 to 1.04      | 0.71    | 0.45 to 1.14      |
| <b>Mutation prevalence (*)</b>       | 90.00%   |                  | 90.00%  | -                 | 90.00%  | -                 |
| <b>Positive Predictive Value (*)</b> | 98.49%   | 95.77% to 99.47% | 100.00% | -                 | 100.00% | -                 |
| <b>Negative Predictive Value (*)</b> | 51.39%   | 34.94% to 67.55% | 13.25%  | 9.62% to 17.99%   | 13.46%  | 8.87% to 19.91%   |
| <b>Accuracy (*)</b>                  | 90.47%   | 83.43% to 95.23% | 34.55%  | 13.17% to 61.82%  | 35.71%  | 14.50% to 62.07%  |
| <b>True positive</b>                 | 79       | -                | 3       | -                 | 2       | -                 |
| <b>True negative</b>                 | 21       | -                | 5       | -                 | 10      | -                 |
| <b>False positive</b>                | 3        | -                | 0       | -                 | 0       | -                 |
| <b>False negative</b>                | 8        | -                | 8       | -                 | 5       | -                 |

Table 2: Test performance statistics in tDNA and cfDNA using Cast-PCR

|                                      | tDNA   |                  | cfDNA  |                  |
|--------------------------------------|--------|------------------|--------|------------------|
|                                      | Value  | 95% CI           | Value  | 95% CI           |
| <b>Sensitivity</b>                   | 97.39% | 92.57% to 99.46% | 90.80% | 82.68% to 95.95% |
| <b>Specificity</b>                   | 92.31% | 63.97% to 99.81% | 87.50% | 67.64% to 97.34% |
| <b>Positive Likelihood Ratio</b>     | 12.66  | 1.93 to 83.25    | 7.26   | 2.52 to 20.98    |
| <b>Negative Likelihood Ratio</b>     | 0.03   | 0.01 to 0.09     | 0.11   | 0.05 to 0.21     |
| <b>Mutation prevalence (*)</b>       | 90.00% |                  | 90.00% |                  |
| <b>Positive Predictive Value (*)</b> | 99.13% | 94.54% to 99.87% | 98.49% | 95.77% to 99.47% |
| <b>Negative Predictive Value (*)</b> | 79.72% | 56.00% to 92.39% | 51.39% | 34.94% to 67.55% |
| <b>Accuracy (*)</b>                  | 96.88% | 92.20% to 99.15% | 90.47% | 83.43% to 95.23% |
| <b>True positive</b>                 | 112    | -                | 79     | -                |
| <b>True negative</b>                 | 12     | -                | 21     | -                |
| <b>False positive</b>                | 1      | -                | 3      | -                |
| <b>False negative</b>                | 3      | -                | 8      | -                |

Table 3: Treatment combination in patients with sequential sampling

| THERAPY                                        | PD ARM (N OF PATIENTS) | SD ARM (N OF PATIENTS) | PR/VGPR ARM (N OF PATIENTS) |
|------------------------------------------------|------------------------|------------------------|-----------------------------|
| <b>DRC</b>                                     | 6                      | 4                      | 6                           |
| <b>IXAZOMIB-DEXAMETHASONE-RITUXIMAB</b>        | 1                      |                        |                             |
| <b>DRC-BORTEZOMIB</b>                          | 1                      | 1                      |                             |
| <b>IBRUTINIB (AFTER DRC)</b>                   |                        |                        | 6                           |
| <b>IBRUTINIB-RITUXIMAB-BORTEZOMIB</b>          |                        |                        | 6                           |
| <b>CYCLOPHOSPHAMIDE-FLUDARABINE-OFATUMUMAB</b> |                        |                        | 1                           |
